# Comprehensive Multigene Phylogenies of Excavate Protists Reveal the Evolutionary Positions of “Primitive” Eukaryotes

Alastair G. B. Simpson,\*† Yuji Inagaki,‡ and Andrew J. Roger\*§

\*Canadian Institute for Advanced Research, Program in Evolutionary Biology, Dalhousie University, Halifax, Nova Scotia, Canada; †Department of Biology, Dalhousie University, Halifax, Nova Scotia, Canada; ‡Center for Computational Sciences and Institute of Biological Sciences, University of Tsukuba, Tsukuba, Ibaraki, Japan; and §Department of Biochemistry and Molecular Biology, Dalhousie University, Halifax, Nova Scotia, Canada

Many of the protists thought to represent the deepest branches on the eukaryotic tree are assigned to a loose assemblage called the “excavates.” This includes the mitochondrion-lacking diplomonads and parabasalids (e.g., *Giardia* and *Trichomonas*) and the jakobids (e.g., *Reclinomonas*). We report the first multigene phylogenetic analyses to include a comprehensive sampling of excavate groups (six nuclear-encoded protein-coding genes, nine of the 10 recognized excavate groups). Excavates coalesce into three clades with relatively strong maximum likelihood bootstrap support. Only the phylogenetic position of *Malawimonas* is uncertain. Diplomonads, parabasalids, and the free-living amitochondriate protist *Carpodiemonas* are closely related to each other. Two other amitochondriate excavates, oxymonads and *Trimastix*, form the second monophyletic group. The third group is comprised of Euglenozoa (e.g., trypanosomes), Heterolobosea, and jakobids. Unexpectedly, jakobids appear to be specifically related to Heterolobosea. This tree topology calls into question the concept of Discicristata as a supergroup of eukaryotes united by discoidal mitochondrial cristae and makes it implausible that jakobids represent an independent early-diverging eukaryotic lineage. The close jakobids-Heterolobosea-Euglenozoa connection demands complex evolutionary scenarios to explain the transition between the presumed ancestral bacterial-type mitochondrial RNA polymerase found in jakobids and the phage-type protein in other eukaryotic lineages, including Euglenozoa and Heterolobosea.

## Introduction

Determining the deep-level structure of the phylogenetic tree of eukaryotes is key to understanding the evolutionary history of complex cells. Of central importance are the various “excavates,” a collection of 10 distinct groups of unicellular eukaryotes united primarily by similarities of cell ultrastructure (Simpson 2003). Early molecular phylogenies of small-subunit ribosomal RNA (SSU rRNA) sequences and elongation factor proteins placed two mitochondrion-lacking (amitochondriate) groups of excavates, Diplomonadida and Parabasala, among the three deepest branches in the eukaryotic tree (Sogin 1989; Sogin et al. 1989; Hashimoto et al. 1994; Yamamoto et al. 1997). This placement catalyzed extensive investigations into the genome organization and cell biology of model diplomonads and parabasalids, in particular, the human parasite *Giardia intestinalis* (Gillin, Reiner, and McCaffery 1996; McArthur et al. 2000). Some more recent phylogenetic analyses and the recognition of organelles seemingly of mitochondrial origin in both parabasalids and diplomonads have weakened the arguments that these groups represent deep-branching eukaryotes (Embley and Hirt 1998; Roger 1999; Philippe et al. 2000; Baldauf 2003; Tovar et al. 2003; Arisue, Hasegawa, and Hashimoto 2005). However, basal positions for both groups remain “textbook science,” and modified proposals potentially affording them a primitive status continue to be advanced (Chihade et al. 2000; Dyall, Brown, and Johnson 2004).

More recently, a different group of excavates, Jakobida, was found to have the most bacterial-like (primitive) mitochondrial genomes known (Lang et al. 1997; Gray, Burger, and Lang 1999; Gray, Lang, and Burger 2004). Jakobid

mitochondrial genomes retain more protein-coding genes than those of other eukaryotes. Most importantly, they encode 2–4 subunits of a bacterial-type RNA polymerase, whereas the mitochondrial RNA polymerase of all other studied eukaryotes is a nonhomologous single subunit “phage-type” enzyme, typically encoded by the nuclear genome. Under the simplest evolutionary scenario, the bacterial-type mitochondrial RNA polymerase was the ancestral form inherited from the endosymbiotic  $\alpha$ -proteobacterium that gave rise to mitochondria and was replaced once in eukaryotic history by the phage-type enzyme. If this scenario is correct, this replacement event must have happened after the divergence of jakobids from other eukaryotes, and jakobids must represent one of the earliest diverging eukaryotic lineages.

Determining the evolutionary significance of any particular excavate group requires a resolution of its phylogenetic relationships with other excavates. Despite genomic sequencing of some species that are human pathogens, there has been virtually no molecular data available that can be compared across all excavates. Some recent phylogenetic analyses do include taxa from most or all of the 10 excavate groups but use data from one or, at most, two genes (Archibald, O’Kelly, and Doolittle 2002; Simpson et al. 2002b; Cavalier-Smith 2003; Keeling and Leander 2003; Simpson 2003). Many relationships among excavates remain essentially unresolved. In particular, robust and precise phylogenetic positions for diplomonads, parabasalids, and jakobids have remained elusive (Baldauf et al. 2000; Gray, Lang, and Burger 2004).

We have assembled the first multigene data set of eukaryotes that includes a taxonomically comprehensive representation of excavates. Our detailed analyses cement a close, yet not specific, relationship between diplomonads and parabasalids and demonstrate a specific relationship between jakobids and the supergroup “Discicristata” (Euglenozoa and Heterolobosea), especially Heterolobosea.

Key words: eukaryote evolution, *Giardia*, mitochondria, Protozoa, tubulin.

E-mail: alastair.simpson@dal.ca.

*Mol. Biol. Evol.* 23(3):615–625. 2006

doi:10.1093/molbev/msj068

Advance Access publication November 24, 2005

This position for jakobids requires complex scenarios to explain their primitive-looking mitochondrial RNA polymerases and questions the validity of Discicristata as a natural (monophyletic) “supergroup” of eukaryotes.

## Materials and Methods

### Material Sources

*Trimastix marina* was purified by serial dilution from an isolation by J. D. Silberman (University of Arkansas) from William’s Lake, Nova Scotia, Canada (44°39’N; 63°34’W) and was maintained on American Type Culture Collection (ATCC) 802 media. The *Carpediemonas membranifera* isolate examined has been described previously (Simpson and Patterson 1999). Genomic DNA (gDNA) was isolated from both cultures using standard protocols (Clark and Diamond 1991). *Rhynchopus* sp. (ATCC 50230) was grown and gDNA was extracted as described previously (Simpson, Lukeš, and Roger 2002). *Rhynchomonas nasuta* gDNA was a kind gift from M. Atkins (Woods Hole Oceanographic Institute, Woods Hole, Mass.). *Reclinomonas americana* (ATCC 50283) gDNA and *Malawimonas jakobiformis* gDNA were kind gifts from B. F. Lang (Université de Montreal, Canada). *Naegleria gruberi* (strain NEG-M) gDNA and *Trimastix pyriformis* (ATCC 50562) cDNA were kindly provided by Å. Sjögren and J. D. Silberman, respectively.

### Gene Discovery

Six slowly evolving nuclear-encoded genes were examined—those for  $\alpha$ -tubulin,  $\beta$ -tubulin, elongation factor 1 $\alpha$  (EF-1 $\alpha$ ), elongation factor 2 (EF-2), cytosolic heat shock protein 70 (HSP70), and cytosolic heat shock protein 90 (HSP90). A total of 26 near-complete or complete coding sequences were determined from various excavates. HSP90 and EF-2 sequences from *Spironucleus barkhanus* and EF-2 from *Naegleria gruberi* were sequenced from cDNA clones identified in expressed sequence tag (EST) surveys. All other sequences were obtained by degenerate polymerase chain reaction (PCR) from gDNA or cDNA templates using a variety of primer combinations, including several new primers with broad applicability (see Supplementary Material online). PCR amplifications were performed with annealing temperatures of 48–55°C. Amplifications from gDNA templates other than *Rhynchopus* and *Rhynchomonas* included 5% w/v acetamide in the reaction cocktail. PCR products were gel-purified and cloned into TA plasmid vectors (TOPO series, Invitrogen, Carlsbad, Calif.) in *Escherichia coli*. One to five positive clones were partially sequenced, and a single clone of each distinct paralog encountered (usually only one) was selected for complete bidirectional sequencing. New sequences have been deposited in GenBank accession numbers (DQ295211–DQ295236).

For alignment, sequences were translated conceptually to amino acids. Where present, spliceosomal introns were detected by eye and eliminated. Amino acid sequences from the examined genes were aligned by eye with homologues from taxa representing a broad diversity of eukaryotes. Some sequences were obtained from publicly accessible

genome or EST projects. Where multiple paralogs of a gene were available, the least divergent sequence was generally used. When deep paralogy was encountered (within animals and plants), preliminary phylogenetic analyses were run to ensure the selection of an orthologous set of sequences from within these groups wherever possible. The six examined genes were concatenated. In six cases (*Trichomonas*, *Eimeria*, *Stylonychia*, *Tetrahymena*, *Porphyr*a, and *Mono-siga*), data from two nominal species were combined as one taxon. Some highly divergent taxa (e.g., microsporidia) and redundant close relatives were excluded, leaving 44 taxa as a broad representation of eukaryotes. Fifteen excavates were retained, representing nine of the 10 excavate groups—the omitted excavate group, retortamonads was excluded solely because of a lack of data and is known with confidence to be specifically related to diplomonads based on SSU rRNA analyses (Silberman et al. 2002) and HSP90 protein trees (A. G. B. Simpson, unpublished data). Ambiguously aligned regions were excluded, leaving a total of 3,142 sites, with every taxon including >75% of the analyzed sequence from 4+ genes and >50% of all examined sites (average 91%) and with “taxonomically isolated” taxa such *Naegleria*, *Reclinomonas*, and *Malawimonas* represented by sequences from all six genes and >80% of examined sites. Species names and included genes are tabulated in the supplementary material (Supplementary Material online), and data sets are available by request to A. G. B. Simpson.

We did not attempt to root the tree using deep eukaryotic paralogs and/or prokaryotic orthologs as outgroups. All possible outgroup sequences would be very distant from the ingroup and have very different patterns of evolutionary rates at sites, a potential source of phylogenetic artefact (Inagaki et al. 2004). As a result, any such rooting of the eukaryotic tree would almost certainly be unreliable (Philippe et al. 2000) and, worse, could bias the estimation of relationships among the ingroup. Our data set would be particularly poorly suited to outgroup analysis as some genes are especially dissimilar to their nearest eukaryotic paralog (e.g., EF-2), while others are extremely distant from the nearest widespread prokaryotic genes (tubulins).

### Phylogenetic Analysis Under a “Linked” Model

Initially, we used a standard linked (concatenated) approach, with a single set of branch lengths and a single among-site rate variation (ASRV) distribution imposed across the whole multigene data set. The maximum likelihood (ML) tree was searched for with PROML 3.6b (Felsenstein 2004) using the Jones-Taylor-Thornton (JTT) amino acid substitution matrix and ASRV modeled by a  $\Gamma$  distribution approximated by four equally probable discrete categories (five random addition sequences and global rearrangements were used). To assess the robustness of our tree, a 500 replicate “fast” ML bootstrap analysis was performed using PHYML (Guindon and Gascuel 2003), under the same model but with an eight-category  $\Gamma$  approximation. The bootstrap analysis was repeated with diplomonads excluded (200 replicates). The  $\alpha$  parameters and discrete rates governing the  $\Gamma$  distribution were estimated from the data using Tree-Puzzle 5.1 (Schmidt et al. 2002).

Although the Whelan and Goldman (WAG) substitution matrix conferred a higher likelihood on the data, the JTT matrix was used because PROML does not support the WAG matrix. Irrespective, we repeated the bootstrap analysis described above using the WAG substitution matrix and 200 replicates and found almost no difference in the support across the tree (not shown).

#### Phylogenetic Analysis Under an “Unlinked” Model

Previous analyses of multigene data sets indicate that model fit can be significantly improved if separate sets of parameters are allowed for the different genes (Bapteste et al. 2002; Pupko et al. 2002). To accommodate within-taxon rate heterogeneity across genes, a second set of analyses was performed under an unlinked model where different branch lengths (and  $\Gamma$  shapes for ARSV) were allowed for each gene. This model can be examined in the Bayesian analysis program MrBayes 3.14 (Ronquist and Huelsenbeck 2003; Nylander et al. 2004). The WAG substitution matrix was applied, with a four-discrete-category  $\Gamma$  approximation for each data set (“WAG +  $\Gamma_4$  model”). The  $\alpha$  parameter values were optimized during the analysis. Several analyses were performed using different random starting trees, with one cold and two heated Markov chain Monte Carlo (MCMC) chains (“temperature” parameter = 0.2), and sampling every 100 generations. Three “long” analyses were run for  $2 \times 10^6$  generations (with a very conservative  $10^6$  generations burn-in) and three “short” analyses for  $5 \times 10^5$  generations ( $3 \times 10^5$  generations burn-in). The three long runs stabilized in two different regions of tree space, and in all, three different topologies of maximum posterior probability were recovered. Accordingly, all eight trees with a posterior probability  $>0.001$  in any one run were compared to the ML tree from the linked analysis and to other user-defined trees constituting minor rearrangements of likely trees (total 202 trees). The user-defined trees included topologies where excavates were monophyletic, where jakobids were not specifically related to Heterolobosea, or where jakobids were not specifically related to Heterolobosea plus Euglenozoa. For each tree, total log-likelihood (ln L) under the unlinked WAG +  $\Gamma_4$  model was obtained from the sum of ln Ls for each gene calculated separately using Tree-Puzzle. This “unlinked model” conferred much greater likelihood on the data than did the analogous linked model ( $\Delta \ln L = 1460 - 1540$ , depending on the tree). This difference was highly significant in likelihood ratio tests ( $P \ll 10^{-5}$ ). A subset of these trees (65) were compared using “approximately unbiased” (AU) tests of significance (Shimodaira 2002), under the unlinked WAG +  $\Gamma_4$  model. For each tree, site likelihoods for each gene were calculated using Tree-Puzzle 5.2. Using these site likelihoods, AU tests were performed using CONSEL 0.1 (Shimodaira and Hasegawa 2001), with default scaling and replicate values.

Statistical uncertainty of phylogenetic estimates was assessed by ML bootstrapping. One-hundred and two bootstrap replicates were generated with partitioned resampling, such that each gene contributed its original number of sites to each replicate (implemented using SEQBOOT and a perl script: b3boot.pl). Each replicate was examined using

MrBayes with the same model and parameters as above except that the MCMC analysis was run for  $2 \times 10^5$  generations, with  $1.5 \times 10^5$  generations burn-in (trials showed that  $>90\%$  of runs stabilized in regions of at least local parameter optimality within this period). For each bootstrap replicate, three independent runs from different random starting trees were performed, and the tree of highest posterior probability from the run with the highest harmonic mean likelihood was selected as an approximation of the ML tree (in other words, a Bayesian analysis was used as an ML estimator for each bootstrapped data set). Even with multiple runs there was probably a larger than normal amount of semirandom phylogenetic error associated with each bootstrap replicate due to incomplete convergence to global optima—thus the bootstrap values for nodes should perhaps be considered somewhat “conservative.” This bootstrap analysis took several processor-months to complete.

#### Single-Gene Jackknifing

To assess whether a discordant signal from any one gene was having a strong effect on our results, we excluded each of the six genes in turn and ran fast 200 or 500 replicate ML bootstrap analyses under the linked model, as described above (for logistical reasons a parallel unlinked analysis was not performed). As reported below, substantial changes in the bootstrap support for important groups were observed only when one particular gene was excluded— $\alpha$ -tubulin. Consequently, the complete array of linked and unlinked analyses described above was repeated with  $\alpha$ -tubulin removed, including AU tests and bootstrap analysis (105 replicates) under the unlinked model.

#### Additional Taxa

After the main analyses described here were performed, additional data become available from some major taxa not included in our original analysis, notably, chlorarachniophytes (Rhizaria: Cercozoa) and cryptophytes (Harper, Waanders, and Keeling 2005). To test whether this new data affected our inferences, we constructed a new data set containing additional taxa as follows: the basidiomycete fungus *Cryptococcus* (all genes), the cyanidialean red alga *Cyanidioschyzon* (all genes), a composite cryptophyte taxon (with all genes except EF-2), the chlorarachniophyte *Bigeloviella*, the dinoflagellate *Heterocapsa*, and the raphidophycean stramenopile *Heterosigma* (the latter three all missing both EF-1 $\alpha$  and EF-2). For the new data set, a 200 replicate bootstrap analysis under the linked model was performed, as above. Our original inferences were largely robust to the inclusion of these additional taxa, except that the position of *Bigeloviella* was unstable (a substantial minority of bootstrap replicates united *Bigeloviella* and *Reclinomonas*). Therefore, the linked model bootstrap analysis was repeated with *Bigeloviella* removed and also with EF-1 $\alpha$  and EF-2 excluded, both with and without *Bigeloviella*. In addition, we compared several plausible trees where *Bigeloviella* either formed a clade with *Reclinomonas* or did not under an unlinked model, by likelihood ratios and an AU test, as described above. For logistical

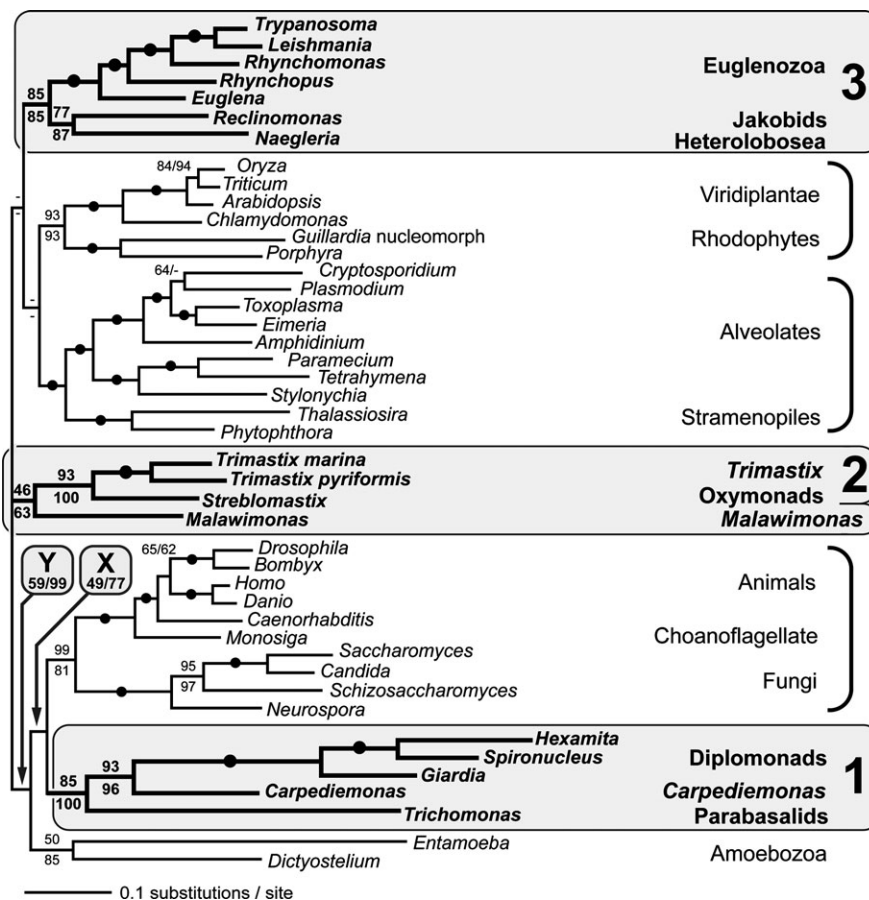

FIG. 1.—ML phylogenetic tree of eukaryotes inferred from six slowly evolving nuclear-encoded proteins. Best topology under unlinked model shown (i.e., with gene-specific branch lengths). Numbers on branches represent ML bootstrap support values for the unlinked model (upper numbers) and linked model (lower numbers). Filled circles represent bipartitions receiving  $>95\%$  support with both methods. Dashes represent values  $<50\%$  not critical to the study. Excavates are identified by gray shading. “1” “2,” and “3” indicate well-supported excavate groups. Note that *Malawimonas* is uncertainly placed. “X” and “Y” denote better-supported bipartitions that separate Group 1 from other excavates.

reasons we did not repeat the full ML analysis under the unlinked model.

## Results

### Analysis of the Complete Data Set

The linked and unlinked analyses give very similar optimal trees (fig. 1), representing a broadly reasonable view of eukaryotic phylogeny, as recovered in recent multigene analyses (Baldauf et al. 2000; Baptiste et al. 2002; Lang et al. 2002; Philippe et al. 2004). Animals and choanoflagellates are sister taxa and are strongly united with fungi to form the opisthokonts. *Dictyostelium* and *Entamoeba* form a clade, consistent with the proposed Amoebozoa supergroup (Cavalier-Smith 1998). We also recover a very strongly supported relationship between alveolates (ciliates, dinoflagellates, and apicomplexans) and stramenopiles, represented by a diatom and an oomycete. Land plants plus green algae (Viridiplantae) are specifically related to red algae (rhodophytes), including the cryptophyte nucleomorph genome, consistent with a larger “Plantae” clade. However, when cryptophyte nuclear genes were included, these branched as the immediate sister to Viridiplantae, interrupt-

ing the monophyly of Plantae (linked model, see Supplementary Material online).

Within this background tree, both linked and unlinked analyses place all excavates except *Malawimonas* in three distinct and strongly supported groups, labeled “1” “2,” and “3” in figure 1.

Excavate Group 1 includes diplomonads, *Carpediemonas*, and the parabasalid *Trichomonas*. Diplomonads are most closely related to *Carpediemonas*, with very strong support, with parabasalids as their sister group. Excavate Group 1 receives strong bootstrap support with both methods (85%, 100%). The group remains strongly supported when diplomonads are excluded (97% bootstrap support with the linked model—tree not shown), so the high support is not due to artificial attraction specifically between parabasalids and the long-branching diplomonads.

Excavate Group 2 unites oxyomonads and the two *Trimastix* spp. Bootstrap support is very strong with both phylogenetic methods employed. This assemblage corresponds to the taxon *Preaxostyla* (Simpson 2003).

Excavate Group 3 unites the evolutionarily important jakobids (represented by *Reclinomonas*) with two well-known protist groups—Euglenozoa (which includes the sleeping sickness and Chagas’ disease parasites, as well as the model

alga *Euglena*) and Heterolobosea (e.g., *Naegleria*). Bootstrap support is strong with both methods (85%). With one exception, alternative trees where Excavate Group 3 is not monophyletic confer markedly less likelihood on the data (unlinked model:  $\Delta \ln L > 35$ ) and, where tested, are rejected by AU tests ( $P < 0.005$ ). The single unrejected tree ( $\Delta \ln L = 25.5$ ;  $P = 0.174$ ) adds the uncertainly positioned *Malawimonas* to Excavate Group 3 as the sister of jakobids. Unexpectedly, we recover a specific relationship between *Reclinomonas* and the heteroloboseid *Naegleria*, interrupting the Discicristata grouping. This jakobids plus Heterolobosea clade (JH) receives strong bootstrap support (77%/87%), although alternative relationships within Excavate Group 3 are not rejected by AU tests.

The position of *Malawimonas* is unresolved. In the unlinked analysis, *Malawimonas* falls as the sister to Excavate Group 2 (fig. 1), while the ML tree from the linked analysis places *Malawimonas* at the base of Excavate Group 3 (not shown). Both positions receive only weak bootstrap support under either of the evolutionary models.

In all of our analyses, Excavate Groups 2 and 3 plus *Malawimonas* are separated by one or two internal branches, which always receive weak bootstrap support ( $\ll 50\%$ ). These bipartitions still show  $< 50\%$  bootstrap support if the taxon *Malawimonas* is pruned from the bootstrap trees after phylogenetic estimation, indicating that the weak support is not merely due to the uncertain position of *Malawimonas*. Excavate Group 1, however, always branches within an opisthokont-Amoebozoa clade, as the sister to opisthokonts, and is therefore separated from Excavate Group 2 by two branches, labeled “X” and “Y” in figure 1. These branches receive strong bootstrap support in the linked analysis (X: 77%; Y: 99%). They receive weaker support in the unlinked analysis (X: 49%; Y: 59%), due partly to the more uncertain position of *Entamoeba*. In fact, all examined trees in which excavates are constrained to be monophyletic are significantly worse explanations of the data under the unlinked model ( $\Delta \ln L > 100$ ) and are rejected by AU tests at low  $\alpha$  levels ( $P < 0.005$ ).

We performed an abbreviated linked analysis including several phylogenetically important taxa that became available after we had begun the computationally intensive linked analysis. The excavate clades described above and their statistical support are essentially unaffected by the inclusion of these new data, except that the bootstrap support for Excavate Group 3 and for its subclade “JH” both decline to 40%–50% (see Supplementary Material online). At issue is the position of the chlorarachniophyte *Bigelowiella* because (1) a substantial minority of bootstrap replicates (33%) unite *Bigelowiella* and the jakobid *Reclinomonas*, and (2) when *Bigelowiella* is excluded, bootstrap support is reasonably high for both Excavate Group 3 and “heteroloboseids plus jakobids” (78%/80%). *Bigelowiella* is unusual within the data set because it is taxonomically very isolated (it is the only member of the supergroup Rhizaria that could be included) yet includes data from just four of the six studied genes and 55% of sites. Unexpectedly, excluding the two genes for which there are no *Bigelowiella* data increases dramatically the bootstrap support for the heteroloboseid-jakobid clade (76%, only marginally lower than that seen when *Bigelo-*

**Table 1**  
Bootstrap Support for Important Groups (linked model), When Individual Genes Excluded from the Analysis (single-gene jackknifing)

| Excluded      | Number of Sites | 1   | 2   | 3  | JH | X               | Y               |
|---------------|-----------------|-----|-----|----|----|-----------------|-----------------|
| None          | 3,142           | 100 | 100 | 85 | 87 | 77              | 99              |
| Tub- $\alpha$ | 2,721           | 95  | 99  | 79 | 82 | 16 <sup>a</sup> | 66 <sup>a</sup> |
| Tub- $\beta$  | 2,717           | 99  | 99  | 71 | 73 | 82              | 94              |
| EF-1 $\alpha$ | 2,734           | 100 | 91  | 77 | 81 | 80              | 99              |
| EF-2          | 2,398           | 100 | 100 | 69 | 70 | 69              | 96              |
| HSP70         | 2,584           | 97  | 92  | 67 | 71 | 64              | 96              |
| HSP90         | 2,556           | 100 | 97  | 70 | 84 | 83              | 95              |

NOTE.—Groups 1, 2, and 3 are major clades of excavates. JH represents the clade of jakobids and Heterolobosea. X and Y unite Excavate Group 1 with opisthokonts, and with opisthokonts and Amoebozoa (see fig. 1).

<sup>a</sup> Note the large reduction in support for X and Y specifically when  $\alpha$ -tubulin is omitted.

*wiella* is excluded from this data set—86%). We suspect that the substantial attraction between *Reclinomonas* and *Bigelowiella* particular to the six-gene data set might be an artefact related to the problem of estimating a single branch length across all genes under the linked model. Consistent with this hypothesis, a relationship between *Bigelowiella* and *Reclinomonas* is associated with a relatively low likelihood under the unlinked model (39.4  $\ln L$  worse than the best plausible tree examined) and is rejected by an AU test under this model (largest  $P = 0.026$ ).

#### Single-Gene Jackknifing

In order to examine the contributions of different genes to our tree, we removed every individual gene in turn from the six-gene data set and compared the bootstrap support for important bipartitions. We reasoned that modest reductions in support for a given bipartition would suggest an additive phylogenetic signal from multiple genes. On the other hand, large reductions may indicate that the support for a bipartition is concentrated in a single gene and might result from a gene-specific phylogenetic artefact or nonstandard evolution history (e.g., lateral gene transfer). In general, there are only modest changes in the support for Excavate Groups 1, 2, and 3 and for the grouping of JH, suggesting that the signals for these clades are contributed by multiple genes (table 1, columns 1–4). However, when  $\alpha$ -tubulin is excluded, support for the association of Excavate Group 1 with opisthokonts (bipartition X) decreases from 77% to just 16%. Support also falls for the (Group 1, opisthokonts, and Amoebozoa) clade—“bipartition Y” (table 1, columns 5 and 6). This indicates that  $\alpha$ -tubulin alone contributes the bulk of the signal placing Excavate Group 1 specifically with opisthokonts.

We subsequently repeated the complete ML analysis with  $\alpha$ -tubulin omitted (fig. 2). The linked and unlinked ML trees from these analyses are similar to those from the full data set, with one important exception—there are no excavate groups within the opisthokont-Amoebozoa clade. In fact, Excavate Group 1 now branches as the specific sister to Excavate Group 2, albeit with very weak bootstrap support (12/17% or 13/27% if the destabilizing taxon *Entamoeba* is pruned). After exclusion of  $\alpha$ -tubulin,

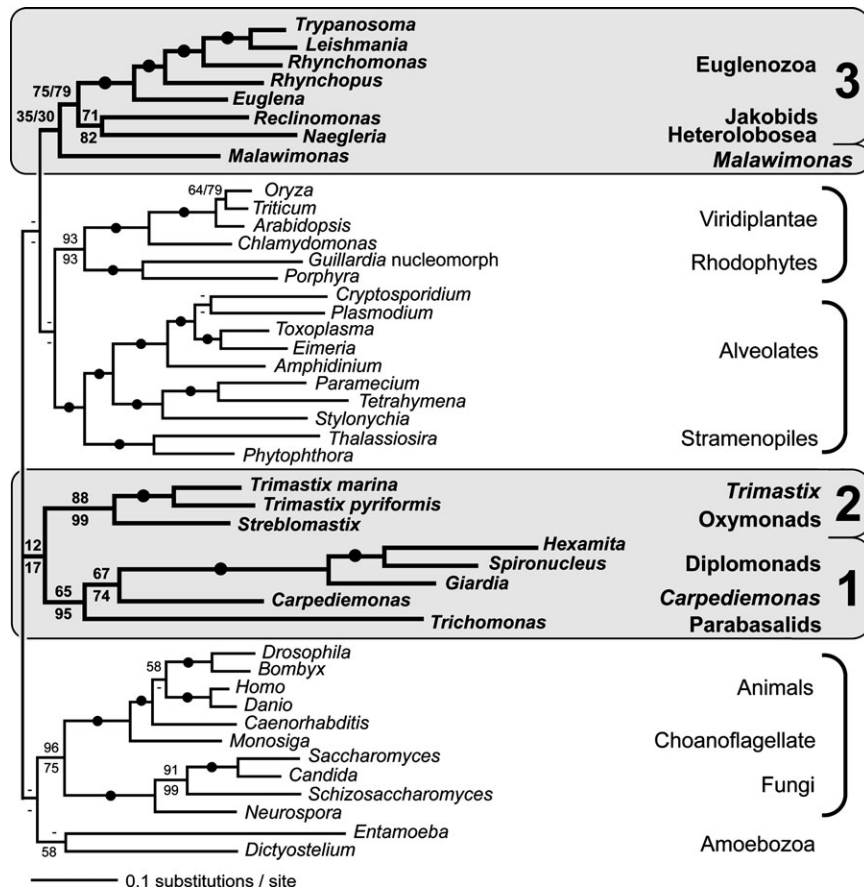

FIG. 2.—ML tree inferred with  $\alpha$ -tubulin excluded (best topology with unlinked model). Bootstrap support values are reported in the same way as figure 1. Note that Excavate Groups 1 and 2 are weakly related, rather than Group 1 being placed with opisthokonts as in the full analysis (see fig. 1).

some trees in which excavates are monophyletic are not rejected in AU tests at a 0.05  $\alpha$  level ( $\Delta \ln L = 24$ ,  $P = 0.141$ ).

## Discussion

### A Multigene, ML Examination of Excavate Evolution

This study is the first comprehensive multigene analysis of excavate phylogeny. Some previous analyses included a good sampling of excavates but used only one or two molecular markers, usually just SSU rRNA sequences (Simpson et al. 2002b; Cavalier-Smith 2003; Keeling and Leander 2003; Simpson 2003; Nikolaev et al. 2004). It is essential to verify these results by using larger multigene data sets because the phylogenetic estimates from single molecular markers are often poorly resolved (e.g., different analyses of the same gene give markedly different phylogenetic estimates) and, in a worst-case scenario, can be positively misleading. Independent data sets that can verify SSU rRNA analyses are doubly important as eukaryotic SSU rRNAs show considerable length variation in many regions along the sequence. This renders both the alignment itself and the selection of “unambiguously aligned sites” for analysis controversial and potentially influenced by the prior phylogenetic beliefs of the researcher. By contrast, the protein sequences examined here display little length variation, making alignment and site

selection trivial concerns. Other recent analyses include data from several-to-many protein-coding genes but include many fewer (2–5) of the 10 excavate groups currently recognized (Baldauf et al. 2000; Baptiste et al. 2002; Lang et al. 2002; Arisue, Hasegawa, and Hashimoto 2005; Harper, Waanders, and Keeling 2005). Such analyses may give misleading pictures of the evolution of excavate eukaryotes, even if the phylogenetic trees reconstructed are topologically correct.

In this analysis, we assess the robustness of our trees using nonparametric bootstrapping. This contrasts with some recent studies of deep eukaryotic phylogeny where Bayesian posterior probabilities are used as the primary measure of robustness when complex (computationally intensive) evolutionary models are employed (Stiller and Hall 2002; Yoon, Hackett, and Bhattacharya 2002; Nikolaev et al. 2004). While they measure different properties, posterior probabilities are routinely much less conservative than bootstrap proportions and are more prone to give strong support for incorrect bipartitions when the evolutionary model is misspecified (Suzuki, Glazko, and Nei 2002; Cummings et al. 2003; Douady et al. 2003; Erixon et al. 2003). Furthermore, there is intrinsic serial correlation in trees and parameters explored during the MCMC analysis, and convergence is difficult to assess. Bayesian analyses can stabilize in locally optimal, rather than globally

optimal, regions of parameter space, giving the potential for catastrophic inaccuracy if convergence is not, or cannot be, verified (this possibility is illustrated by intermediate steps in our unlinked analyses, where initially identical long MCMC runs started from different random trees estimated posterior probabilities of 0 and 1 for the same bipartition—data not shown). Bootstrap resamplings are intrinsically independent and, with the number of bootstrap replicates routinely examined in phylogenetic analyses (rarely <50), will not be subject to the same possibility of catastrophe (for a given tree-searching strategy). For all of these reasons, we consider strong bootstrap values as more reliable indication of a well-supported grouping than very high posterior probabilities.

### The Evolutionary Position of Jakobids

Our study provides the first robust indication of the evolutionary position of jakobids—they are close relatives of Heterolobosea and Euglenozoa. Previous studies of tubulins and CCT $\alpha$  proteins and some recent analyses of SSU rRNA genes have hinted at this relationship, but the grouping has usually received very weak statistical support (Edgcomb et al. 2001; Archibald, O’Kelly, and Doolittle 2002; Simpson et al. 2002*b*; Cavalier-Smith 2003, 2004; Nikolaev et al. 2004). In our best estimate, jakobids are actually specifically related to Heterolobosea. This result conflicts with well-sampled SSU rRNA trees, which usually group Heterolobosea and Euglenozoa to the exclusion of jakobids (Cavalier-Smith 2003, 2004; Simpson 2003; Berney, Fahrni, and Pawlowski 2004; Nikolaev et al. 2004). Euglenozoa and Heterolobosea have highly divergent SSU rRNA sequences, and it is plausible that their grouping in SSU rRNA trees could be a long-branch attraction artefact. By contrast, none of Euglenozoa, Heterolobosea, or jakobids are particularly long branches (or otherwise remarkable) in our analysis. Further, multigene studies are required to definitively resolve the exact branching pattern between Euglenozoa, Heterolobosea, and jakobids, and these should incorporate an improved taxon sampling of the latter two groups. In fact, we recover the same basic jakobid-heteroloboseid clade in preliminary multi-protein analyses that include additional jakobid taxa (not shown—A. G. B. Simpson, unpublished data).

Historically, mitochondrial cristae have been the single most important morphological character for deep eukaryote phylogeny (Taylor 1976; Patterson 1994). Heterolobosea and Euglenozoa have unusual “discoidal” mitochondrial cristae. This shared character was central in uniting these two groups as the taxon Discicristata, along with gene phylogenies that did not include jakobids (Keeling and Doolittle 1996; Cavalier-Smith 1998; Baldauf et al. 2000; Baldauf 2003). By contrast, jakobids have tubular or flattened cristae (O’Kelly 1993)—the most common forms in eukaryotes. In light of our results, it is possible that discoidal cristae evolved independently in Heterolobosea and Euglenozoa. Alternatively, because *Malawimonas* also has discoidal cristae (O’Kelly and Nerad 1999), it is not impossible that discoidal cristae were ancestral for all excavates and thus appeared earlier than the last common ancestor of Euglenozoa and Heterolobosea (even

if Euglenozoa and Heterolobosea were found to be sister taxa to the exclusion of jakobids). Either way, on both phylogenetic and morphological grounds, the current widely accepted concept of the supergroup Discicristata is open to dispute and could well be untenable.

### Implications for Mitochondrial RNA Polymerase Evolution

The specific relationship between jakobids, Heterolobosea, and Euglenozoa has important implications for proposals that jakobids represent primitive eukaryotes. While jakobids have some bacterial-type RNA polymerase subunits encoded by their mitochondrial genomes (Lang et al. 1997; Gray et al. 2004), both Heterolobosea and Euglenozoa are known to have standard eukaryotic viral-type mitochondrial RNA polymerases encoded by their nuclear genomes (Cermakian et al. 1996; Clement and Koslowsky 2001). The jakobid bacterial-type RNA polymerase can be considered a uniquely primitive character only if the root of the eukaryotic tree lies exactly on the jakobid branch. This rooting position would imply that “Excavate Group 3” cladistically includes all other living eukaryotes. If the placement of jakobids in our ML topology is accurate, it would also imply that Euglenozoa and Heterolobosea are more distantly related than are animals and plants, for example. Because a close relationship between Euglenozoa and Heterolobosea is now widely accepted, this would constitute a major upheaval of the established tree of eukaryotes.

There are several evolutionary scenarios that might account for the distribution of mitochondrial RNA polymerases in eukaryotes without uprooting the entire eukaryotic tree. All of them are complex or invoke apparently rare or dramatic evolutionary events. Firstly, the last common ancestor of eukaryotes may have had both viral- and bacterial-type mitochondrial RNA polymerases, which were then differentially lost in various eukaryotic lineages (Stechmann and Cavalier-Smith 2002). However, if jakobids are deeply nested within other eukaryotes, several independent losses of the bacterial type would have to be inferred, unless some extant eukaryotes still carry both forms (this has yet to be documented). Secondly, the bacterial type alone might be ancestral for living eukaryotes, with the viral-type in Euglenozoa and Heterolobosea being acquired much later by lateral gene transfers from other eukaryotes, or perhaps viruses or plasmids. Again, if jakobids and Heterolobosea are specifically related, two independent transfers (at the very least) would be required. Finally, the viral-type polymerase might be ancestral for all eukaryotes, with the bacterial type representing a more recent lateral transfer from a prokaryote into the mitochondrial genome of an ancestral jakobid. While mitochondria are overwhelmingly viewed as gene donors rather than gene recipients (Adams and Palmer 2003; Burger, Gray, and Lang 2003), the probable transfer of apparently functional genes into mitochondrial genomes has now been documented in land plants, fungi, and cnidarians (Paquin, Laforest, and Lang 1994; Pont-Kingdom et al. 1998; Bergthorsson et al. 2003, 2004; Davis and Wurdack 2004). In some land plants, the transferred gene did not directly supplant an existing mitochondrial gene but instead

replaced (or exists in concert with) a gene that has long since been transferred to the nucleus in the host lineage (Bergthorsson et al. 2003). This latter situation is most closely analogous to the scenario by which jakobid mitochondrial RNA polymerase might have been acquired by lateral transfer.

#### Other Excavate Groups

Our multigene analyses confirm some relationships among other excavates suggested by earlier single-gene analyses. We recovered a strong specific relationship between *Trimastix* and oxymonads, previously inferred only from SSU rRNA trees (Dacks et al. 2001; Simpson et al. 2002*b*; Keeling and Leander 2003). We also confirm a close relationship between diplomonads and the obscure free-living amitochondriate organism *Carpediemonas* (Simpson, MacQuarrie, and Roger 2002; Simpson et al. 2002*b*). Most interestingly, we recovered a specific relationship between diplomonads, *Carpediemonas*, and parabasalids with high support. This latter result bridges the gap between two classes of prior phylogenetic studies. (1) Several protein analyses unite diplomonads and parabasalids but do not include any other excavates except Euglenozoa and Heterolobosea and, in one instance, oxymonads (Embley and Hirt 1998; Baldauf et al. 2000; Arisue, Hasegawa, and Hashimoto 2005; Harper, Waanders, and Keeling 2005). (2) Some recent excavate-rich SSU rRNA and tubulin analyses show a specific relationship between parabasalids and the total diplomonad-*Carpediemonas* clade, usually with weak support (Simpson et al. 2002*b*; Cavalier-Smith 2003; Keeling and Leander 2003; Simpson 2003). It is also consistent with recent evidence that common ancestors of diplomonads and parabasalids acquired at least two genes by lateral transfer (Henze et al. 2001; Andersson, Sarchfield, and Roger 2005).

Finding relatives of diplomonads and parabasalids has been a long-standing problem. Our six-gene analysis locates Excavate Group 1, including diplomonads and parabasalids, as the specific relatives of opisthokonts. This position is suspicious because it interrupts the association of opisthokonts and Amoebozoa, a grouping for which there is increasing evidence from other analyses and data (Baldauf et al. 2000; Baptiste et al. 2002). However, this placement of Excavate Group 1 is due largely to a “conflicting signal” of uncertain origin from just one gene ( $\alpha$ -tubulin). In fact, when  $\alpha$ -tubulin is excluded, our best trees place Excavate Groups 1 and 2 together. This basic relationship has been recovered (with extremely weak support) in a small minority of SSU rRNA gene trees (Simpson et al. 2002*b*; Cavalier-Smith 2003; Berney, Fahmi, and Pawlowski 2004; Cavalier-Smith 2004). Interestingly, all lineages in Excavate Groups 1 and 2 are anaerobes that lack classical aerobic mitochondria, hinting that they may derive from a common ancestor that had already lost aerobic mitochondrial functions (Cavalier-Smith 2003; Simpson and Roger 2004). We refer to this as the “neoaerobiosis hypothesis” (Simpson and Roger 2004).

Very recently, Hampl et al. (2005) presented a multigene analysis including several excavate groups—diplomonads and parabasalids (Excavate Group 1), Eugle-

nozoa, and most interestingly, an oxymonad (representing our Excavate Group 2). Their analyses examined just under half as many taxa as our study but included more genes (up to nine total). As in our study, they identified a particularly strong incongruity between  $\alpha$ -tubulin and the “majority” phylogenetic signal with respect to the placement of diplomonads and parabasalids. With or without this data, they also recovered a specific relationship between Excavate Groups 1 and 2 but with quite strong ML bootstrap support under a linked model (and posterior probability 1 under an unlinked model).

#### Excavate Monophyly and Estimating the Eukaryote Tree

It has been argued that all excavates from a monophyletic supergroup of eukaryotes—Excavata—largely on the basis of morphological data (Cavalier-Smith 2002; Simpson et al. 2002*a*; Simpson 2003). Once the aberrant signal from  $\alpha$ -tubulin is excluded, our analysis neither supports nor statistically rejects the monophyly of all excavate groups. This mirrors the results from recent excavate-rich SSU rRNA analyses where certain taxon and alignment combinations yield a monophyletic excavate assemblage with almost no statistical support (Cavalier-Smith 2003; Nikolaev et al. 2004), while other analyses do not recover excavate monophyly but are unable to reject it either (Simpson et al. 2002*b*; Simpson 2003). If excavates are monophyletic, there seems to be little phylogenetic signal indicating that this remaining in molecular sequences. Considerably more data, perhaps a hundred or more genes, from an appropriate sample of excavates will be required to better examine the excavate monophyly. Unfortunately, most of the best studied excavates (e.g., *Giardia*, *Trichomonas*, and trypanosomatids) are among the worst “long branching taxa” in the entire eukaryotic tree. It will be important to ensure that relationships between excavates recovered in phylogenomic multigene analyses are due to authentic historical signal rather than analysis artefact (Sullivan and Swofford 2001). The inclusion of lesser known but shorter-branching excavates in larger multigene analysis could reduce the chance of phylogenetic artifact, either by breaking long branches or by acting as surrogates for related long-branch taxa which could then be excluded from consideration. The latter strategy may have improved phylogenetic accuracy in some single-gene analyses involving excavates (Simpson et al. 2002*b*; Cavalier-Smith 2003; Nikolaev et al. 2004).

Ultimately, we will need to examine directly the positions of the major excavate groups relative to the root of the eukaryotic tree. Perhaps, the best evidence pinpointing the placement of the eukaryotic root are the phylogenetic distributions of complex molecular characters, namely, fused dihydrofolate reductase and thymidylate synthase (DHFR-TS) genes and a three-enzyme fusion in the pyrimidine biosynthesis pathway (Stechmann and Cavalier-Smith 2002, 2003). Unfortunately, DHFR and TS genes are missing altogether in some critical excavates (e.g., *Giardia*), while recent evidence indicates that the pyrimidine biosynthesis enzyme fusion has a complex evolutionary history (Arisue, Hasegawa, and Hashimoto 2005), making these data hard to interpret at present, especially with respect to placement of



excavates. Analysis where eukaryotes are rooted by outgroups represent a more traditional avenue, however, sophisticated multigene analyses including a few excavate groups are strongly suspected to be affected by analysis artefact (Bapteste et al. 2002; Arisue, Hasegawa, and Hashimoto 2005). Trees of genes universal to eukaryotes almost invariably exhibit a very long internal branch joining the eukaryote clade to other sequences, while the deep internal branches within eukaryotes are relatively short. Under these conditions, analysis artefact can overwhelm historical signal irrespective of the amount of data (Philippe et al. 2000, 2004). For instance, there are often distinctly different patterns of evolutionary rates at sites across a gene (“covarion shifts”) between eukaryotes and other sequences (Inagaki et al. 2004). Evolutionary models currently used for phylogenetic reconstruction do not model covarion shifts, making these a difficult-to-counteract source of artefact. The impact of a covarion shift could be reduced by exclusion of alignment positions that differ substantially in evolutionary rate across a particular pair of subtrees (Inagaki et al. 2004). However, for a reliable estimate of the eukaryotic root, new models that can account for covarion shifts will be indispensable.

### Supplementary Material

Table S1 in the online supplementary material details new PCR primers. Table S2 details the primer combinations used to amplify various coding regions. Table S3 shows the species and gene coverage of the data set used for our main analysis. Figure S1 shows a tree estimated by ML under a linked model, using a somewhat more taxon-rich data set (see *Materials and Methods*). All supplementary materials are available at *Molecular Biology and Evolution* online (<http://www.mbe.oxfordjournals.org/>).

### Acknowledgments

The authors thank E. Susko (Dalhousie University) for discussions, J. D. Silberman (University of Arkansas) for *Trimastix pyriformis* cDNA, T. Hashimoto (University of Tsukuba) for sharing data prior to publication, J. Leigh (Dalhousie) for two Python scripts, and C. Blouin (Dalhousie) for supplementary computational resources. A.G.B.S. is supported as a scholar of the Canadian Institute for Advanced Research (CIAR). A.J.R. is supported as a fellow of the CIAR, by a New Investigator Salary Award from the Canadian Institutes for Health Research/Peter Lougheed foundation, and the Alfred P. Sloan foundation. Y.I. is supported by an institutional grant from Nagahama Institute of Bioscience and Technology. The research was supported by Natural Sciences and Engineering Research Council of Canada grant 227085-00 to A.J.R. Computational resources were funded by the “Prokaryotic Genome Evolution and Diversity” Genome Atlantic/Genome Canada large-scale project. Some sequences from *Phytophthora sojae*, *Thalassiosira pseudonana*, and *Chlamydomonas reinhardtii* were derived from genome sequence data from the Joint Genome Institute (Calif.). Some sequences for *Eimeria tenella* were derived from an in progress genome sequencing project at the Sanger Institute (Cambridge, United Kingdom).

### Literature Cited

- Adams, K. L., and J. D. Palmer. 2003. Evolution of mitochondrial gene content: gene loss and transfer to the nucleus. *Mol. Phylogenet. Evol.* **29**:380–395.
- Andersson, J. O., S. W. Sarchfield, and A. J. Roger. 2005. Gene transfers from Nanoarchaeota to an ancestor of diplomonads and parabasalids. *Mol. Biol. Evol.* **22**:85–90.
- Archibald, J. M., C. J. O’Kelly, and W. F. Doolittle. 2002. The chaperonin genes of jakobid and jakobid-like flagellates: implications for eukaryotic evolution. *Mol. Biol. Evol.* **19**:422–431.
- Arisue, N., M. Hasegawa, and T. Hashimoto. 2005. Root of the Eukaryota tree as inferred from combined maximum likelihood analyses of multiple molecular sequence data. *Mol. Biol. Evol.* **22**:409–420.
- Baldauf, S. L. 2003. The deep roots of eukaryotes. *Science* **300**:1703–1706.
- Baldauf, S. L., A. J. Roger, I. Wenk-Siefert, and W. F. Doolittle. 2000. A kingdom-level phylogeny of eukaryotes based on combined protein data. *Science* **290**:972–977.
- Bapteste, E., H. Brinkmann, J. A. Lee et al. (11 co-authors). 2002. The analysis of 100 genes supports the grouping of three highly divergent amoebae: *Dictyostelium*, *Entamoeba*, and *Mastigamoeba*. *Proc. Natl. Acad. Sci. USA* **99**:1414–1419.
- Bergthorsson, U., K. L. Adams, B. Thomason, and J. D. Palmer. 2003. Widespread horizontal transfer of mitochondrial genes in flowering plants. *Nature* **424**:197–201.
- Bergthorsson, U., A. O. Richardson, G. J. Young, L. R. Goertzen, and J. D. Palmer. 2004. Massive horizontal transfer of mitochondrial genes from diverse land plant donors to the basal angiosperm *Amborella*. *Proc. Natl. Acad. Sci. USA* **101**:17747–17752.
- Berney, C., J. F. Fahrni, and J. Pawlowski. 2004. How many novel eukaryotic ‘kingdoms’? Pitfalls and limitations of environmental DNA surveys. *BMC Biol.* **2**:13.
- Burger, G., M. W. Gray, and B. F. Lang. 2003. Mitochondrial genomes: anything goes. *Trends Genet.* **19**:709–716.
- Cavalier-Smith, T. 1998. A revised six-kingdom system of life. *Biol. Rev.* **73**:203–266.
- . 2002. The phagotrophic origin of eukaryotes and phylogenetic classification of Protozoa. *Int. J. Syst. Evol. Microbiol.* **52**:297–354.
- . 2003. The excavate protozoan phyla Metamonada Grasse emend. (Anaeromonadea, Parabasalia, *Carpediomonas*, Eopharyngia) and Loukozoa emend. (Jakobea, *Malawimonas*): their evolutionary affinities and new higher taxa. *Int. J. Syst. Evol. Microbiol.* **53**:1741–1758.
- . 2004. Only six kingdoms of life. *Proc. R. Soc. Lond. B* **271**:1251–1262.
- Cermakian, N., T. M. Ikeda, R. Cedergren, and M. W. Gray. 1996. Sequences homologous to yeast mitochondrial and bacteriophage T3 and T7 RNA polymerases are widespread throughout the eukaryotic lineage. *Nucleic Acids Res.* **24**:648–654.
- Chihade, J. W., J. R. Brown, P. R. Schimmel, and L. Ribas de Pouplana. 2000. Origin of mitochondria in relation to evolutionary history of eukaryotic alanyl-tRNA synthetase. *Proc. Natl. Acad. Sci. USA* **97**:12153–12157.
- Clark, C. G., and L. S. Diamond. 1991. The Laredo strain and other ‘*Entamoeba histolytica*-like’ amoebae are *Entamoeba moshkovskii*. *Mol. Biochem. Parasitol.* **46**:11–18.
- Clement, S. L., and D. J. Koslowsky. 2001. Unusual organization of a developmentally regulated mitochondrial RNA polymerase (TBMTRNAP) gene in *Trypanosoma brucei*. *Gene* **272**:209–218.

- Cummings, M. P., S. A. Handley, D. S. Myers, D. L. Reed, A. Rokas, and K. Winka. 2003. Comparing bootstrap and posterior probability values in the four-taxon case. *Syst. Biol.* **52**:477–487.
- Dacks, J. B., J. D. Silberman, A. G. B. Simpson, S. Moruya, T. Kudo, M. Ohkuma, and R. Redfield. 2001. Oxymonads are closely related to the excavate taxon *Trimastix*. *Mol. Biol. Evol.* **18**:1034–1044.
- Davis, C. C., and K. J. Wurdack. 2004. Host-to-parasite gene transfer in flowering plants: phylogenetic evidence from Malpighiales. *Science* **305**:676–677.
- Douady, C. J., F. Delsuc, Y. Boucher, W. F. Doolittle, and E. J. P. Douzery. 2003. Comparison of Bayesian and maximum likelihood bootstrap measures of phylogenetic reliability. *Mol. Biol. Evol.* **20**:248–254.
- Dyall, S. D., D. M. Brown, and P. J. Johnson. 2004. Ancient invasions: from endosymbionts to organelles. *Science* **304**:253–257.
- Edgcomb, V. P., A. J. Roger, A. G. B. Simpson, D. Kysela, and M. L. Sogin. 2001. Evolutionary relationships among “jakobid” flagellates as indicated by alpha- and beta-tubulin phylogenies. *Mol. Biol. Evol.* **18**:514–522.
- Embley, T. M., and R. P. Hirt. 1998. Early branching eukaryotes? *Curr. Opin. Genet. Dev.* **8**:624–629.
- Erixon, P., B. Sennblad, T. Britton, and B. Oxelman. 2003. Reliability of Bayesian posterior probabilities and bootstrap frequencies in phylogenies. *Syst. Biol.* **52**:665–673.
- Felsenstein, J. 2004. PHYLIP (phylogeny inference package), version 3.6b. Distributed by the author, University of Washington, Seattle.
- Gillin, F. D., D. S. Reiner, and J. M. McCaffery. 1996. Cell biology of the primitive eukaryote *Giardia lamblia*. *Annu. Rev. Microbiol.* **50**:679–705.
- Gray, M. W., G. Burger, and B. F. Lang. 1999. Mitochondrial evolution. *Science* **283**:1476–1481.
- Gray, M. W., B. F. Lang, and G. Burger. 2004. Mitochondria of protists. *Annu. Rev. Genet.* **38**:477–524.
- Guindon, S., and O. Gascuel. 2003. A simple, fast, and accurate algorithm to estimate large phylogenies by maximum likelihood. *Syst. Biol.* **52**:696–704.
- Hampl, V., D. S. Horner, P. Dyal, J. Kulda, J. Flegr, P. Foster, and T. M. Embley. 2005. Inference of the phylogenetic position of oxymonads based on nine genes: support for Metamonada and Excavata. *Mol. Biol. Evol.* **22**:2508–2518.
- Harper, J. T., E. Waanders, and P. J. Keeling. 2005. On the monophyly of chromalveolates using a six-protein phylogeny of eukaryotes. *Int. J. Syst. Evol. Microbiol.* **55**:487–496.
- Hashimoto, T., Y. Nakamura, F. Nakamura, T. Shirakura, J. Adachi, N. Goto, K. Okamoto, and M. Hasegawa. 1994. Protein phylogeny gives a robust estimation for early divergences of eukaryotes: phylogenetic place of a mitochondria-lacking protozoan, *Giardia lamblia*. *Mol. Biol. Evol.* **11**:65–71.
- Henze, K., D. S. Horner, S. Suguri, D. V. Moore, L. B. Sanchez, M. Müller, and T. M. Embley. 2001. Unique phylogenetic relationships of glucokinase and glucosephosphate isomerase of the amitochondriate eukaryotes *Giardia intestinalis*, *Spiro-nucleus barkhanus* and *Trichomonas vaginalis*. *Gene* **281**:123–131.
- Inagaki, Y., E. Susko, N. M. Fast, and A. J. Roger. 2004. Covarion shifts cause a long-branch attraction artifact that unites microsporidia and archaeobacteria in EF-1 $\alpha$  phylogenies. *Mol. Biol. Evol.* **21**:1340–1349.
- Keeling, P. J., and W. F. Doolittle. 1996. Alpha-tubulin from early-diverging eukaryotic lineages and the evolution of the tubulin family. *Mol. Biol. Evol.* **13**:1297–1305.
- Keeling, P. J., and B. S. Leander. 2003. Characterisation of a non-canonical genetic code in the oxymonad *Streblomastix strix*. *J. Mol. Biol.* **326**:1337–1349.
- Lang, B. F., G. Burger, C. J. O’Kelly, R. Cedergren, G. B. Golding, C. Lemieux, D. Sankoff, M. Turmel, and M. W. Gray. 1997. An ancestral mitochondrial DNA resembling a eubacterial genome in miniature. *Nature* **387**:493–497.
- Lang, B. F., C. J. O’Kelly, T. A. Nerad, M. W. Gray, and G. Burger. 2002. The closest unicellular relatives of animals. *Curr. Biol.* **12**:1773–1778.
- McArthur, A., H. Morrison, J. Nixon et al. 2000. The *Giardia* genome project database. *FEMS Microbiol. Lett.* **189**:271–273.
- Nikolaev, S. I., C. Berney, J. F. Fahrni, I. Bolivar, S. Polet, A. P. Mylnikov, V. V. Aleshin, N. B. Petrov, and J. Pawlowski. 2004. The twilight of Heliozoa and rise of Rhizaria, an emerging supergroup of amoeboid eukaryotes. *Proc. Natl. Acad. Sci. USA* **101**:8066–8071.
- Nylander, J. A. A., F. Ronquist, J. P. Huelsenbeck, and J. L. Nieves-Aldrey. 2004. Bayesian phylogenetic analysis of combined data. *Syst. Biol.* **53**:47–67.
- O’Kelly, C. J. 1993. The jakobid flagellates: structural features of *Jakoba*, *Reclinomonas* and *Histiona* and implications for the early diversification of eukaryotes. *J. Eukaryot. Microbiol.* **40**:627–636.
- O’Kelly, C. J., and T. A. Nerad. 1999. *Malawimonas jakobiformis* n. gen., n. sp. (Malawimonadidae fam. nov.): a *Jakoba*-like heterotrophic nanoflagellate with discoidal mitochondrial cristae. *J. Eukaryot. Microbiol.* **46**:522–531.
- Paquin, B., M.-J. Laforest, and B. F. Lang. 1994. Interspecific transfer of mitochondrial genes in fungi and creation of a homologous hybrid gene. *Proc. Natl. Acad. Sci. USA* **91**:11807–11810.
- Patterson, D. J. 1994. Protozoa: evolution and systematics. Pp. 1–14 in K. Hausmann and N. Hülsmann, eds. *Progress in protozoology*. Gustav Fischer Verlag, Berlin, Germany.
- Philippe, H., P. Lopez, H. Brinkmann, K. Budin, A. Germot, J. Laurent, D. Moreira, M. Müller, and H. Le Guyader. 2000. Early-branching or fast-evolving eukaryotes? An answer based on slowly evolving positions. *Proc. R. Soc. Lond. B* **267**:1213–1221.
- Philippe, H., E. A. Snell, E. Baptiste, P. Lopez, P. W. H. Holland, and D. Casane. 2004. Phylogenomics of eukaryotes: impact of missing data on large alignments. *Mol. Biol. Evol.* **21**:1740–1752.
- Pont-Kingdon, G., N. A. Okada, J. L. Macfarlane, C. T. Beagley, C. D. Watkins-Sims, T. Cavalier-Smith, G. D. Clark-Walker, and D. R. Wolstenholme. 1998. Mitochondrial DNA of the coral *Sarcophyton glaucum* contains a gene for a homologue of bacterial MutS: a possible case of gene transfer from the nucleus to the mitochondrion. *J. Mol. Evol.* **46**:419–431.
- Pupko, T., D. Huchon, Y. Cao, N. Okada, and M. Hasegawa. 2002. Combining multiple data sets in a likelihood analysis: which models are the best? *Mol. Biol. Evol.* **19**:2294–2307.
- Roger, A. J. 1999. Reconstructing early events in eukaryotic evolution. *Am. Nat.* **154**:S146–S163.
- Ronquist, F., and J. P. Huelsenbeck. 2003. MrBayes 3: Bayesian phylogenetic inference under mixture models. *Bioinformatics* **19**:1572–1574.
- Schmidt, H. A., K. Strimmer, M. Vingron, and A. von Haeseler. 2002. TREE-PUZZLE: maximum likelihood phylogenetic analysis using quartets and parallel computing. *Bioinformatics* **18**:502–504.
- Shimodaira, H. 2002. An approximately unbiased test of phylogenetic tree selection. *Syst. Biol.* **51**:492–508.

- Shimodaira, H., and M. Hasegawa. 2001. CONSEL: for assessing the confidence of phylogenetic tree selection. *Bioinformatics* **17**:1246–1247.
- Silberman, J. D., A. G. B. Simpson, J. Kulda, I. Cepicka, V. Hampl, P. J. Johnson, and A. J. Roger. 2002. Retortamonad flagellates are closely related to diplomonads—implications for the history of mitochondrial function in eukaryote evolution. *Mol. Biol. Evol.* **19**:777–786.
- Simpson, A. G. B. 2003. Cytoskeletal organisation, phylogenetic affinities and systematics in the contentious taxon Excavata (Eukaryota). *Int. J. Syst. Evol. Microbiol.* **53**:1759–1777.
- Simpson, A. G. B., J. Lukeš, and A. J. Roger. 2002. The evolutionary history of kinetoplasts and their kinetoplasts. *Mol. Biol. Evol.* **19**:2071–2083.
- Simpson, A. G. B., E. K. MacQuarrie, and A. J. Roger. 2002. Early origin of canonical introns. *Nature* **419**:270.
- Simpson, A. G. B., and D. J. Patterson. 1999. The ultrastructure of *Carpodemonas membranifera* (Eukaryota) with reference to the excavate hypothesis. *Eur. J. Protistol.* **35**:353–370.
- Simpson, A. G. B., R. Radek, J. B. Dacks, and C. J. O’Kelly. 2002a. How oxymonads lost their groove: an ultrastructural comparison of *Monocercomonoides* and excavate taxa. *J. Eukaryot. Microbiol.* **49**:239–248.
- Simpson, A. G. B., and A. J. Roger. 2004. Excavata and the origin of amitochondriate eukaryotes. Pp. 27–53 in R. P. Hirt and D. S. Horner, eds. *Organelles, genomes and eukaryote phylogeny: an evolutionary synthesis in the age of genomics*. CRC Press, Boca Raton, Fla.
- Simpson, A. G. B., A. J. Roger, J. D. Silberman, D. Leipe, V. P. Edgcomb, L. S. Jermini, D. J. Patterson, and M. L. Sogin. 2002b. Evolutionary history of ‘early diverging’ eukaryotes: the excavate taxon *Carpodemonas* is closely related to *Giardia*. *Mol. Biol. Evol.* **19**:1782–1791.
- Sogin, M. L. 1989. Evolution of eukaryotic microorganisms and their small subunit ribosomal RNAs. *Am. Zool.* **29**:487–499.
- Sogin, M. L., J. H. Gunderson, H. J. Elwood, R. A. Alonso, and D. A. Peattie. 1989. Phylogenetic significance of the kingdom concept: an unusual eukaryotic 16S-like ribosomal RNA from *Giardia lamblia*. *Science* **243**:75–77.
- Stechmann, A., and T. Cavalier-Smith. 2002. Rooting the eukaryote tree by using a derived gene fusion. *Science* **297**:89–91.
- . 2003. The root of the eukaryote tree pinpointed. *Curr. Biol.* **13**:R665–R666.
- Stillar, J. W., and B. D. Hall. 2002. Evolution of the RNA polymerase II C-terminal domain. *Proc. Natl. Acad. Sci. USA* **99**:6091–6096.
- Sullivan, J., and D. L. Swofford. 2001. Should we use model-based methods of phylogenetic inference when we know that assumptions about among-site rate variation and nucleotide substitution pattern are violated? *Syst. Biol.* **50**:723–729.
- Suzuki, Y., G. V. Glazko, and M. Nei. 2002. Overcredibility of molecular phylogenies obtained by Bayesian phylogenetics. *Proc. Natl. Acad. Sci. USA* **99**:16138–16143.
- Taylor, F. J. R. 1976. Flagellate phylogeny: a study in conflicts. *J. Protozool.* **23**:28–40.
- Tovar, J., G. Leon-Avila, L. B. Sanchez, R. Sutak, J. Tachezy, M. Van Der Giezen, M. Hernandez, M. Muller, and J. M. Lucocq. 2003. Mitochondrial remnant organelles of *Giardia* function in iron-sulphur protein maturation. *Nature* **426**:172–176.
- Yamamoto, A., T. Hashimoto, E. Asaga, M. Hasegawa, and N. Goto. 1997. Phylogenetic position of the mitochondrion-lacking protozoan *Trichomonas tenax*, based on amino acid sequences of elongation factors 1-alpha and 2. *J. Mol. Evol.* **44**:98–105.
- Yoon, H. S., J. D. Hackett, and D. Bhattacharya. 2002. A single origin of the peridinin- and fucoxanthin-containing plastids in dinoflagellates through tertiary endosymbiosis. *Proc. Natl. Acad. Sci. USA* **99**:11724–11729.

Martin Embley, Associate Editor

Accepted November 15, 2005
